# Supplementary material for: Uncovering the Unusual Long Chains of Vegetative Cells within Single Colonies of the Dryland Nitrogen-Fixing Cyanobacterium Nostoc flagelliforme
Source: MDPI journal article supplement (doi:10.3390/nitrogen5010009), 2024-02-20
Supplement: s1 [file s1]

**Table S1** The genes and their primers used for transcriptional analysis in this study.

| <b>Genes</b>  | <b>Forward primers (5'-3')</b> | <b>Reverse primers (5'-3')</b> |
|---------------|--------------------------------|--------------------------------|
| <i>hetR</i>   | GGTGGAAGATACCGCTCGG            | GCCCAGGCACGGATAACTTC           |
| <i>patA</i>   | CACTTCCGATTAGTAGATACAGA        | CTAAATACCTGTAAACAACCAG         |
| <i>hepA</i>   | GGTAGAACAGTAATTGCGAT           | ATCTGGTGATATTCCCAAAGC          |
| <i>nifH</i>   | GGTAAATCTACCACCTCCCA           | ACGGGTGGAGTCAGCTTTAG           |
| <i>rnpB</i>   | AAGAGCGCACCCAGCAGTATC          | GCTTGTTACCAAACGCCTCT           |
| 16S rRNA gene | CAGGTGGCAATGTAAGTCT            | TCGTCCCTCAGTGTCAGTT            |
